# Supplementary material for: The impact of using chickpea flour and dried carp fish powder on pizza quality
Source: PubMed Central journal article supplement (PMC5584754; doi:10.1371/journal.pone.0183657), 2017-09-05

***In vitro* protein digestibility (%)**

| Wheat                 |        |        |
|-----------------------|--------|--------|
| control               | 82.4   | 0.53 c |
| 5% dried carp fish    | 84.6   | 1.02 b |
| 7.50% dried carp fish | 85.24  | 0.25 b |
| 10% dried carp fish   | 86.32  | 0.13 a |
| 5% chickpea flour     | 82.52  | 0.81 c |
| 7.50% chickpea flour  | 82.632 | 0.16 c |
| 10% chickpea flour    | 82.8   | 0.27 c |

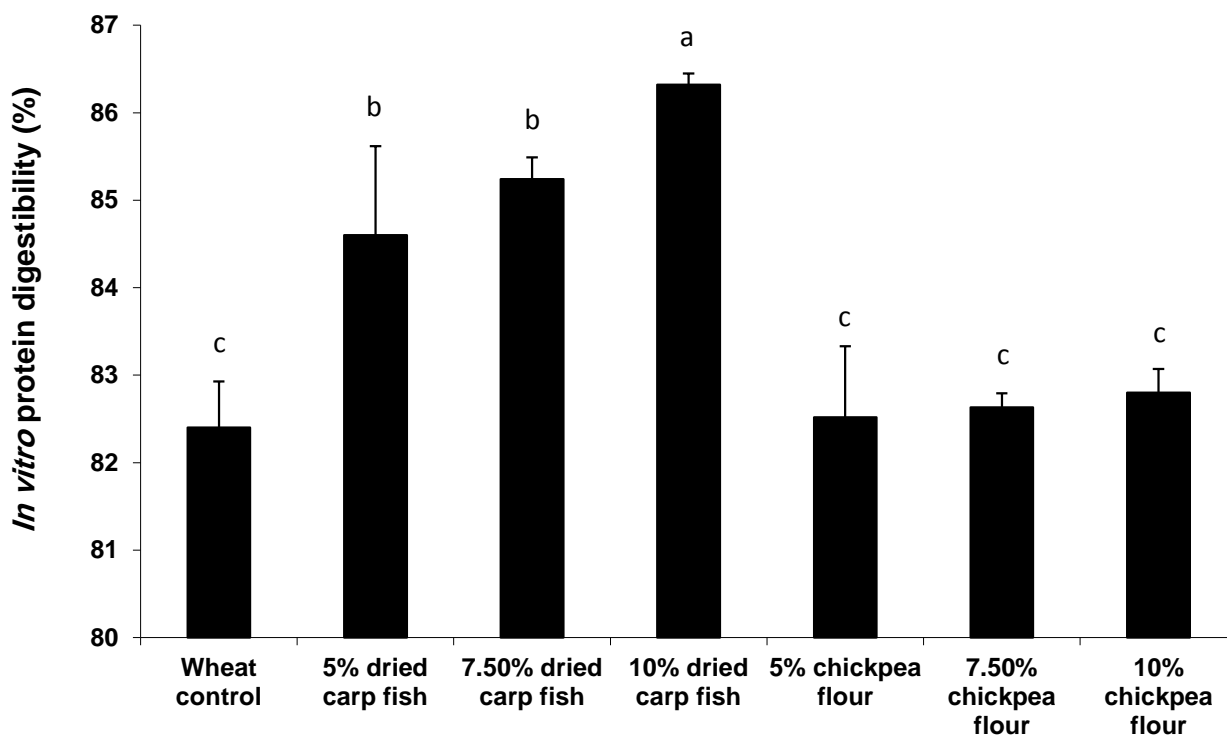

Supplement: pone.0183657.s002.pdf [file pone.0183657.s002.pdf]
