# Supplementary material for: The impact of using chickpea flour and dried carp fish powder on pizza quality
Source: PLoS One. 2017 Sep 5;12(9):e0183657. doi: 10.1371/journal.pone.0183657 (PMC5584754; doi:10.1371/journal.pone.0183657)
Supplement: S1 Tables — (XLS) [file pone.0183657.s003.xls]

## Sheet: Fatty acids
	Carb Fish								Chickpea
	1	2	3						1	2	3
1899-12-31 14:00:00	1.256	1.26	1.26					1899-12-31 14:00:00	0.32	0.33	0.31
1899-12-31 14:01:00	0.09972	0.1	0.1					1899-12-31 14:01:00	0	0	0
1899-12-31 15:00:00	0.3	0.3	0.3					1899-12-31 15:00:00	0	0	0
1899-12-31 15:01:00	0.184	0.184	0.19					1899-12-31 15:01:00	0	0	0
1899-12-31 16:00:00	18.905	18.91	19.452					1899-12-31 16:00:00	11.54	11.5	11.58
1899-12-31 16:01:00	9.23	9.97	9.6					1899-12-31 16:01:00	0.34	0.35	0.33
1899-12-31 17:00:00	0.342	0.34	0.34					1899-12-31 17:00:00	0	0	0
1899-12-31 17:01:00	0.44	0.43954	0.44					1899-12-31 17:01:00	0	0	0
1899-12-31 18:00:00	4.04232	4.04	4.04					1899-12-31 18:00:00	4.52	4.42	4.62
1899-12-31 18:01:00	44.3942	44.39	44.4					1899-12-31 18:01:00	27.69	27.39	27.99
1899-12-31 18:02:00	9.37	9.671	9.521					1899-12-31 18:02:00	46.14	45.94	46.34
18:3n6 (9, 12, 15)	0.252	0.252	0.252					18:3n6	0	0	0
18:3n3 (6,9,12)	0.9	0.89623	0.9					18:3n3 (6,9,12)	7.95	7.8	8.1
1899-12-31 20:00:00	0.1405	0.141	0.141					1899-12-31 20:00:00	0.8	0.82	0.78
1899-12-31 20:01:00	2.41133	2.41	2.41					1899-12-31 20:01:00	0.7	0.71	0.69
1899-12-31 20:02:00	1.00314	1.00314	1.00314					1899-12-31 20:02:00	0	0	0
1899-12-31 20:03:00	0.3672	0.37	0.37					1899-12-31 20:03:00	0	0	0
1899-12-31 20:04:00	0.8225	0.823	0.9435					1899-12-31 20:04:00	0	0	0
1899-12-31 20:05:00	0.4372	0.44	0.44					1899-12-31 20:05:00	0	0	0
1899-12-31 22:00:00	0.08402	0.1	0.08402					1899-12-31 22:00:00	0	0	0
1899-12-31 22:02:00	0.12567	0.13	0.13					1899-12-31 22:02:00	0	0	0
1899-12-31 22:03:00	0.099	0.1	0.1					1899-12-31 22:03:00	0	0	0
1899-12-31 22:04:00	0.243	0.24	0.24					1899-12-31 22:04:00	0	0	0
1899-12-31 22:05:00	0.173	0.173	0.173					1899-12-31 22:05:00	0	0	0
1899-12-31 22:06:00	0.6323	0.63228	0.6323					1899-12-31 22:06:00	0	0	0
1900-01-01	0.455	0.46	0.46					1900-01-01	0	0	0

## Sheet: Chemical
		Oil	protein	Ash	Fiber	TC					Energy
	Wheat control	3.601	11.38	0.69	0.37	84.329					415.245
		3.621	11.39	0.792	0.39	84.197					414.937
		3.641	11.4	0.893	0.4	84.066					414.633
	5% carp fish	3.9	13.27	0.884	0.38	81.946					415.964
		3.9	13.35	0.894	0.395	81.856					415.924
		3.98	13.43	0.904	0.405	81.686					416.284
	7.50% carp fish	4.1	14.1941	0.8633	0.4	80.8426					417.047
		4.1	14.2941	0.9	0.4	80.7059					416.9
		4.16	14.3941	0.93	0.41	80.5159					417.08
	10% carp fish	4.3	15.16	0.91	0.418	79.63					417.86
		4.3	15.34	0.93	0.42	79.43					417.78
		4.34	15.52	0.95	0.422	79.19					417.9
	5% chickpea flour	3.44	11.75	0.8182	0.40303	83.9918					413.927
		3.7	11.8	0.8282	0.4425	83.6718					415.187
		4	11.8	0.8382	0.4625	83.3618					416.647
	7.50% chickpea flour	3.8	12.14	0.86	0.4	83.2					415.56
		3.8	12.17	0.87	0.47	83.16					415.52
		3.83	12.21	0.88	0.5	83.08					415.63
	10% chickpea flour	3.75	12	0.82	0.42	83.43					415.47
		3.84	12.3	0.89	0.515	82.97					415.64
		3.92	12.6	0.96	0.535	82.52					415.76
				raw materials
		fat	protein	ash	Fiber	TC	Fe	ZN	PD		Energy
	Fish	14.38	78.08	2.9842		4.5558	2.042	3.24	65.94		459.963
		14.385	79.5	3.08		3.035	3.921	3.2	65.935		459.605
		14.39	80.92	3.085		1.605	2.982	3.28	66		459.61
	Chickpea	5.611	19.13	2.34	1.42	72.919	6.175	4.58	78.23		418.695
		5.67	19.8	2.42	1.45	72.11	5.313	4.1331	78.73		418.67
		5.72	20.47	2.5	1.473	71.31	5.744	3.49	77.73		418.6
	Wheat	1	11.21	0.5	0.4	87.29	3.771	1.7	80		403
		1.09	11.31	0.62	0.4	86.98	3.671	1.72	80.15		402.97
		1.26	11.4	0.7	0.44	86.64	3.871	1.68	79.85		403.5

## Sheet: Amino acids
		Chickpea						Carp fish
		g/ 100g Protein						Protein	78.08	79.5	80.92
	Protein	19.13	19.8	20.47
	Aspartic	10.9252	10.5556	10.2101				Aspartic	10.0282	9.84906	9.67622
	Serine	3.65917	3.53535	3.41964				Serine	3.21465	3.15723	3.10183
	Glutamic	14.3231	13.8384	13.3854				Glutamic	13.3325	13.0943	12.8646
	Cys	2.87507	2.77778	2.68686				Cys	1.729	1.69811	1.66831
	Proline	4.02509	3.88889	3.7616				Proline	3.49641	3.43396	3.3737
	Glycine	3.71145	3.58586	3.46849				Glycine	4.75154	4.66667	4.58478
	Alaine	4.02509	3.88889	3.7616				Alaine	5.77613	5.67296	5.57341
	Argine	7.94564	7.67677	7.4255				Argine	6.0707	5.96226	5.85764										0
	Histidine	2.82279	2.72727	2.63801				Histidine	3.34273	3.28302	3.22541										0
	Total amounts of non essential amino acids							Total amounts of non essential amino acids
		54.3126	52.4747	50.7572					51.7418	50.8176	49.9259
		Chickpea	g/ 100g Protein acids										Carp fish
		19.13	19.8	20.47					78.08	79.5	80.92
	Isoleucine	4.18191	4.0404	3.90816				Isoleucine	4.58504	4.50314	4.42412
	Leucine	6.84788	6.9697	6.39961				Leucine	7.77408	7.63522	7.50124
	Lysine	6.63879	6.41414	6.2042				Lysine	8.82428	8.66667	8.51458
	Methionine	1.35912	1.31313	1.27015				Methionine	3.00973	2.95597	2.9041
	Phenyoline	6.06377	5.85859	5.66683				Phenyoline	4.6875	4.60377	4.52299
	Tyrosine	3.45008	3.33333	3.22423				Tyrosine	3.71414	3.6478	3.58379
	Threoine	3.34553	3.23232	3.12653				Threoine	4.08555	4.01258	3.94217
	Valine	4.28646	4.14141	4.00586				Valine	4.89242	4.80503	4.72071
	Total amounts of essential amino acids							Total amounts of essential amino acids	41.5727	40.8302	40.1137	0.729565
		36.1735	35.303	33.8056	1.19774
																					78.08
																					79.5
																					80.92
																					1.42
																					19.13
																					19.8
																					20.47
																					20

## Sheet: All parametars
										Textural
		Fe	Zn	Protein digestibility	aW				Firmness	Cohesiveness	gumminess	chewiness	springiness
	Wheat control	3.591	1.62	81.79	0.989			Wheat control	1.289	0.53	0.6824	0.5	0.732
		2.37	1.6	82.71	0.985				1.29	0.81	1.045	0.847	0.81
		3.244	1.6	82.69	0.987				1.2895	0.67	0.8637	0.6735	0.771
	5% carp fish	3.1	1.696	83.6	0.9224			5% carp fish	1.645	0.665	1.094	0.744	0.68
		3	1.685	84.6	0.893				1.64	0.705	1.156	0.833	0.72
		3.151	1.6031	85.6	0.908				1.6425	0.685	1.125	0.7885	0.7
	7.50% carp fish	3.1	1.697	85.04	0.906			7.50% carp fish	1.76	0.602	1.06	0.601	0.567
		3.192	1.74	85.24	0.897				1.766	0.702	1.24	0.955	0.77
		3.15	1.72	85.44	0.893				1.763	0.652	1.15	0.778	0.6685
	10% carp fish	2.92	1.78	86.32	0.893			10% carp fish	1.865	0.619	1.154	0.58	0.5
		3.232	1.78	86.32	0.897				1.87	0.62	1.16	0.79	0.68
		3.6	1.76	86.32	0..873				1.8675	0.6195	1.157	0.685	0.59
	5% chickpea flour	3.24	1.711	82.53	0.913			5% chickpea flour	1.804	0.608	1.097	0.663	0.604
		3.56	1.7	82.33	0.922				1.844	0.61	1.125	0.77	0.684
		3.01	1.7	81.72	0.918				1.824	0.609	1.111	0.7165	0.644
	7.50% chickpea flour	3.1	1.76	82.733	0.903			7.50% chickpea flour	1.88	0.54	1.02	0.612	0.6
		3.4	1.7	82.53	0.908				1.884	0.6	1.13	0.791	0.7
		3.46	1.8	82.632	0.906				1.882	0.57	1.075	0.7015	0.65
	10% chickpea flour	3.36	1.814	82.53	0.898			10% chickpea flour	1.92	0.502	0.964	0.66	0.68
		3.45	1.832	83.06	0.889				1.96	0.542	1.141	0.8	0.7
		3.55	1.85	82.8	0.894				1.94	0.522	1.0525	0.73	0.69

## Sheet: t- test
		Carb Fish
				TBA	TPC	Coliform
		Before	1	0.18	1.39x100	0
			2	0.192	1.40x100	0
			3	0.204	1.41x100	0
		After	1	0.25	1.574x100	0
			2	0.31	1.60x100	0
			3	0.37	1.626x100	0
